# Supplementary material
Source: PubMed Central journal article supplement (PMC3241533)
Supplement: NIHMS63072-supplement-1si20051115_03.pdf [file NIHMS63072-supplement-1si20051115_03.pdf]

**Supporting Information:**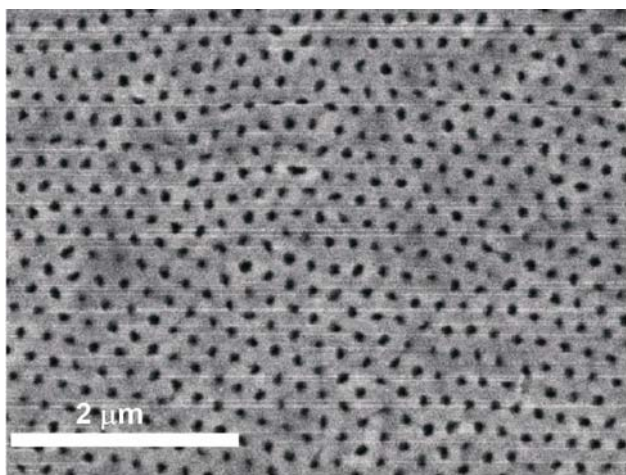

**Supporting Information Figure 1:** SEM image of anodic alumina oxide template with 85 nm diameter pore.

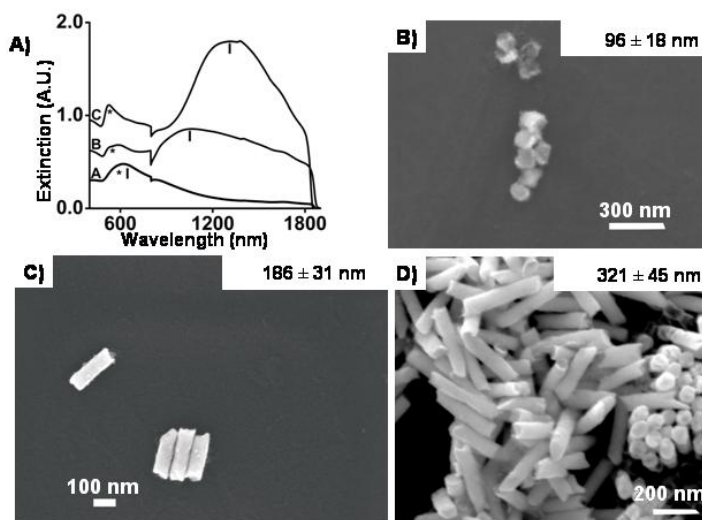

**Supporting Information Figure 2:** A) UV-vis-NIR spectra for: 96 nm (bottom), 186 nm (middle), and 321 nm (top) long gold rods. SEM images of: B) 96 nm, C) 186 nm, and D) 321 nm long gold rods.
